# Supplementary material for: Modeling Optimal Timing of Immunotherapy and Chemotherapy to Prevent Resistance and Recurrence in Triple-Negative Breast Cancer
Source: Research Square preprint supplement (doi:10.21203/rs.3.rs-6963681/v1), 2025-07-23
Supplement: Supplementary file 1 [file a38dab67941542befe9550c4.docx]

**
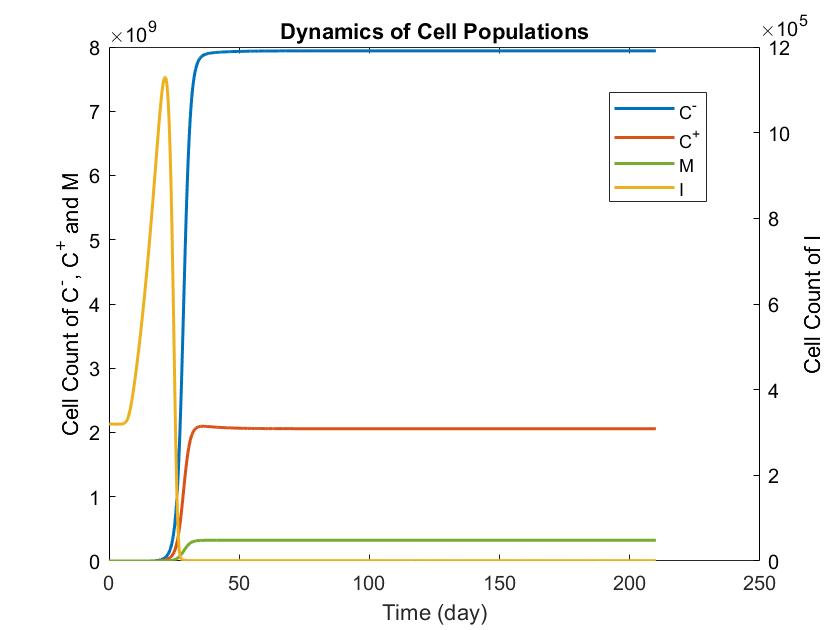
Supplemental Figures**

**Supplemental Figure 1: Dynamics of cell populations during monotherapy with RGX**

Initial Conditions: Treatment begins on day 11, with τ set to 1.1 10-7

The population of MDSCs is regulated by the treatment, but in the absence of an effective MTX-mediated cytotoxic effect, the C- subpopulation becomes dominant.


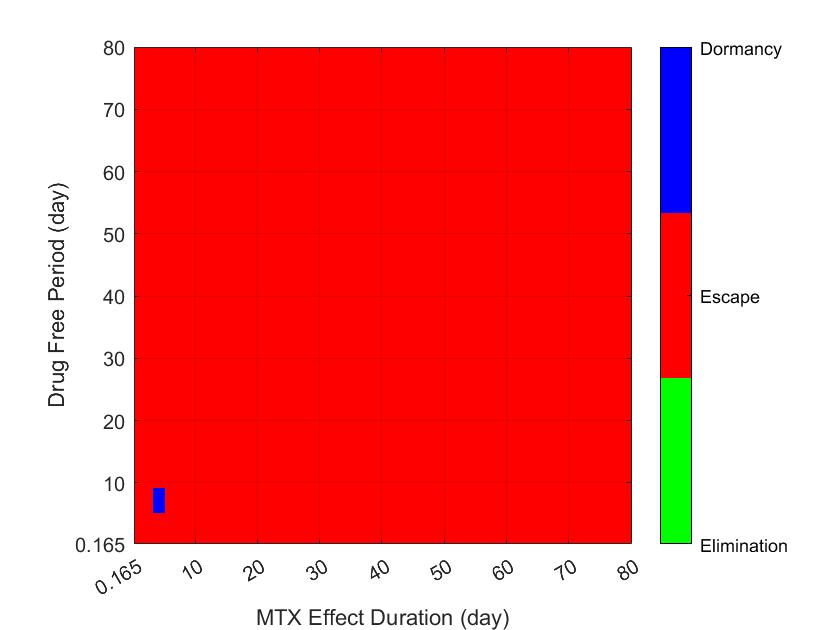


B

A


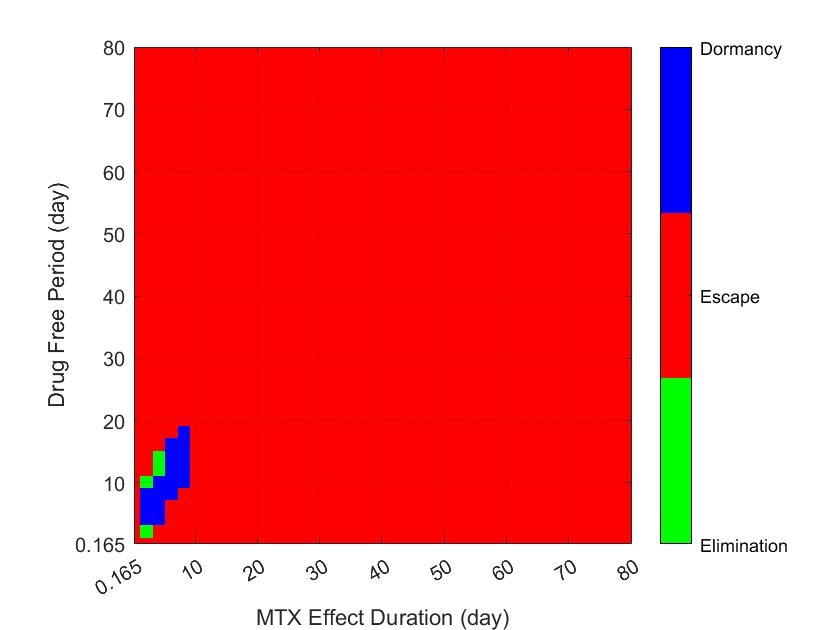


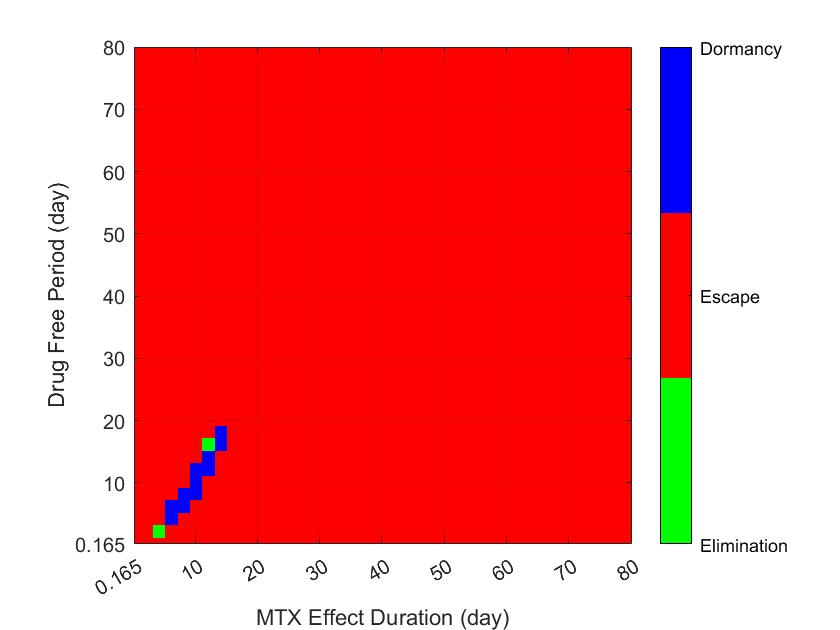


C

**Supplemental Figure 2: Tumor fate following MTX monotherapy across different τ values and treatment initiation times**

A) τ=1.6 10-7, treatment initiated on day 11

B) τ=2.86 10-7, treatment initiated on day 11

C) τ=1. 6 10-7, treatment initiated on day 19


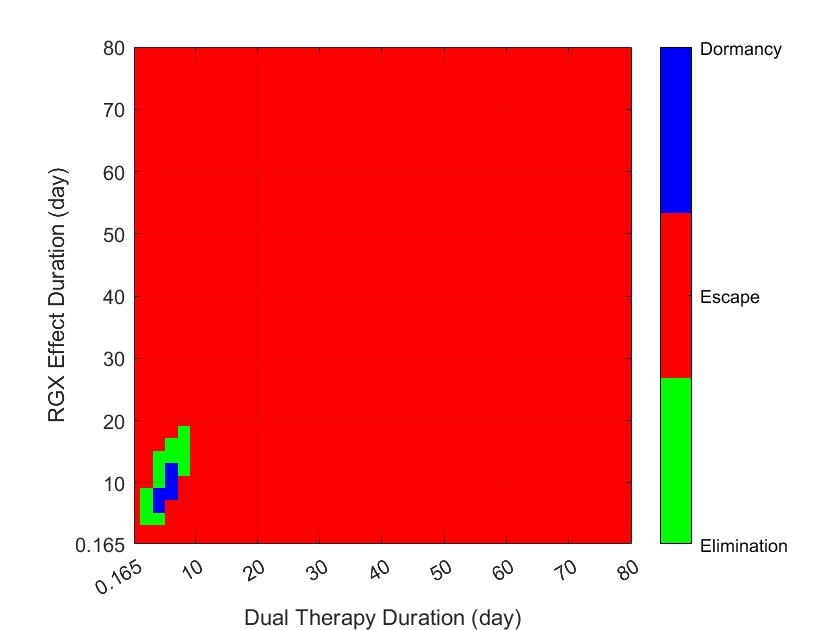

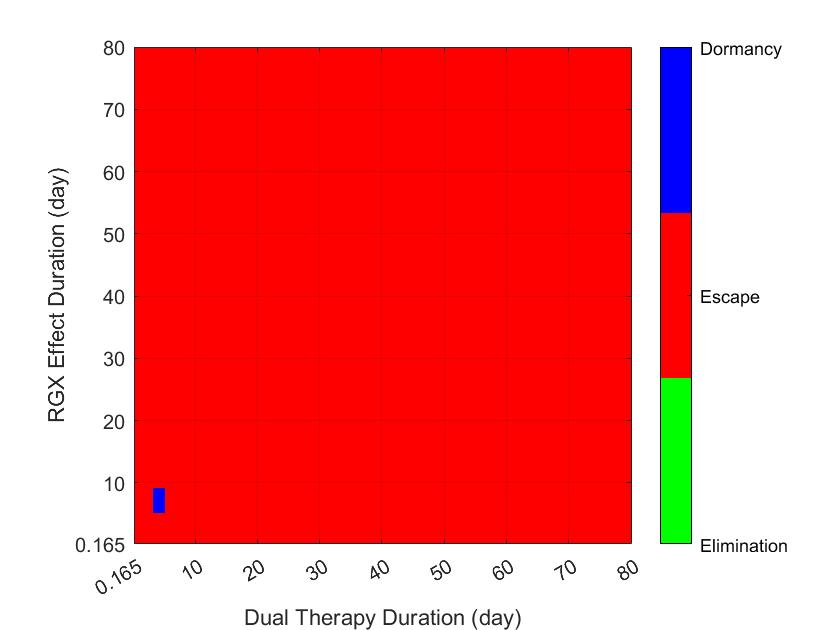


A

B

**Supplemental Figure 3: Tumor fate following starting MTX-RGX dual-therapy on the day 11**

A) τ=1.1 10-7

B) τ=1.6 10-7
